# Supplementary material for: Morphometric Analyses of Leaf Shapes in Four Sympatric Mediterranean Oaks and Hybrids in the Algerian Kabylie Forest
Source: MDPI journal article supplement (doi:10.3390/f13040508), 2022-03-25
Supplement: s1 [file s1]

Supplementary materials

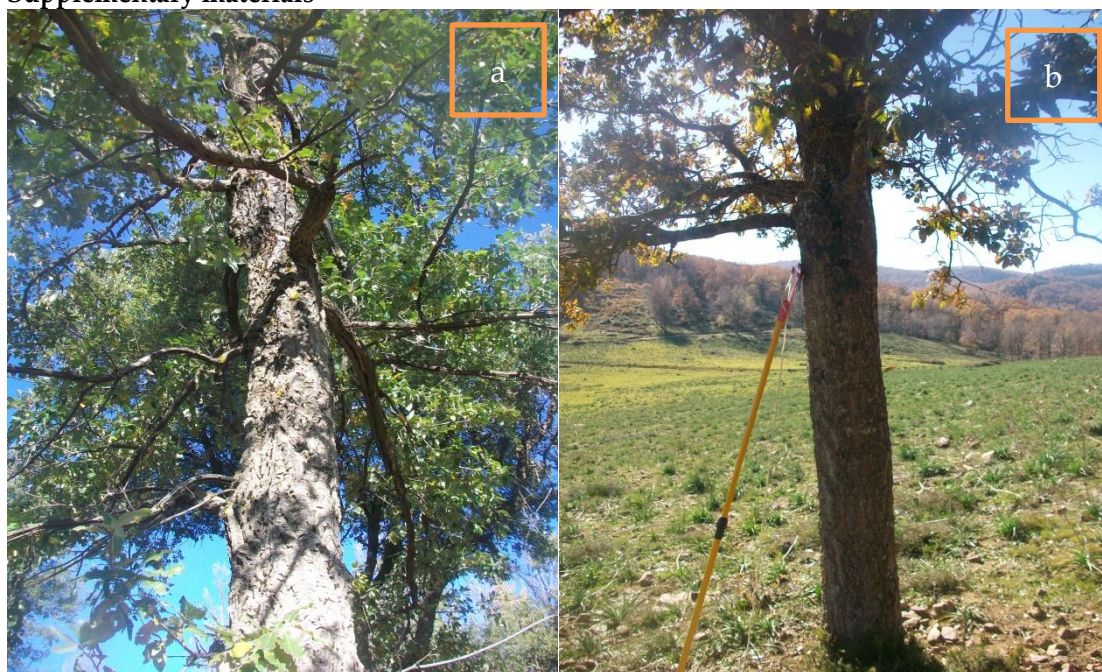

**Figure S1.** Hybrid oaks (Location: CY-Cynegetic center)

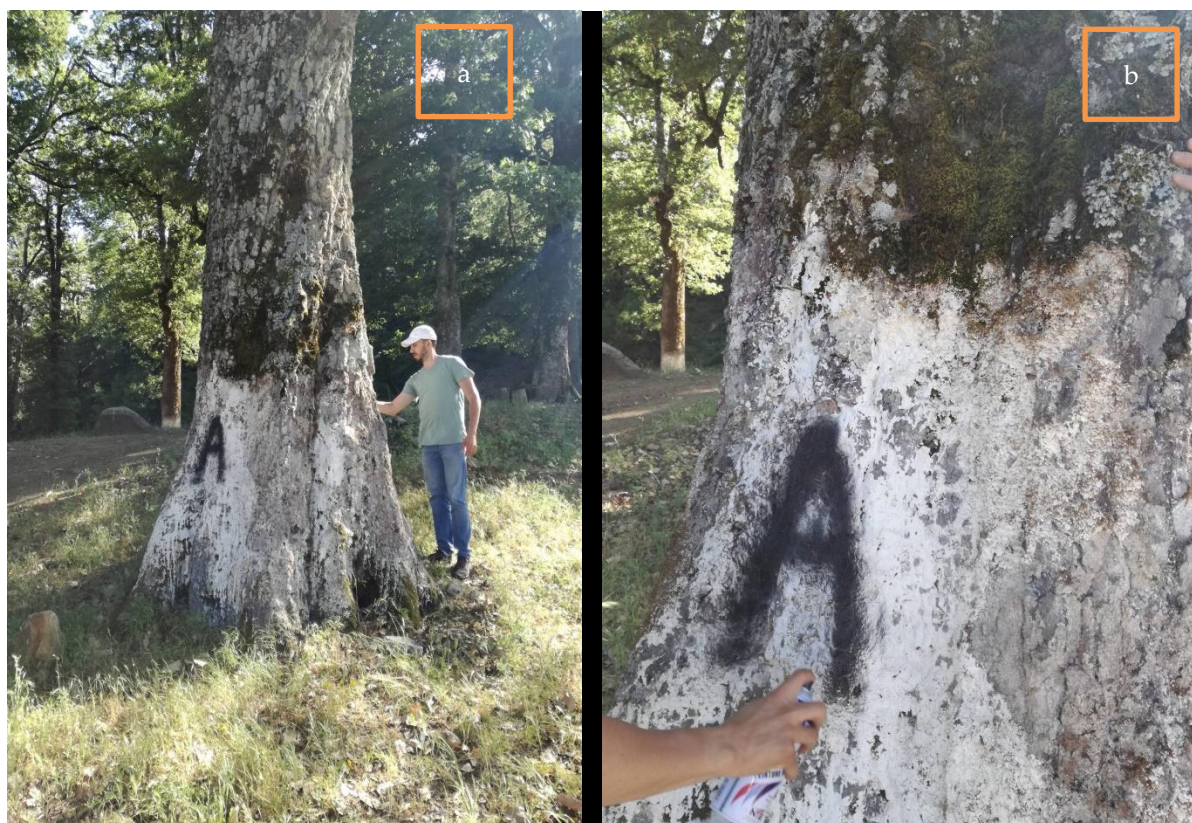

**Figure S2.** *Quercus afares* (Location: SH- Sidi El Hadi)



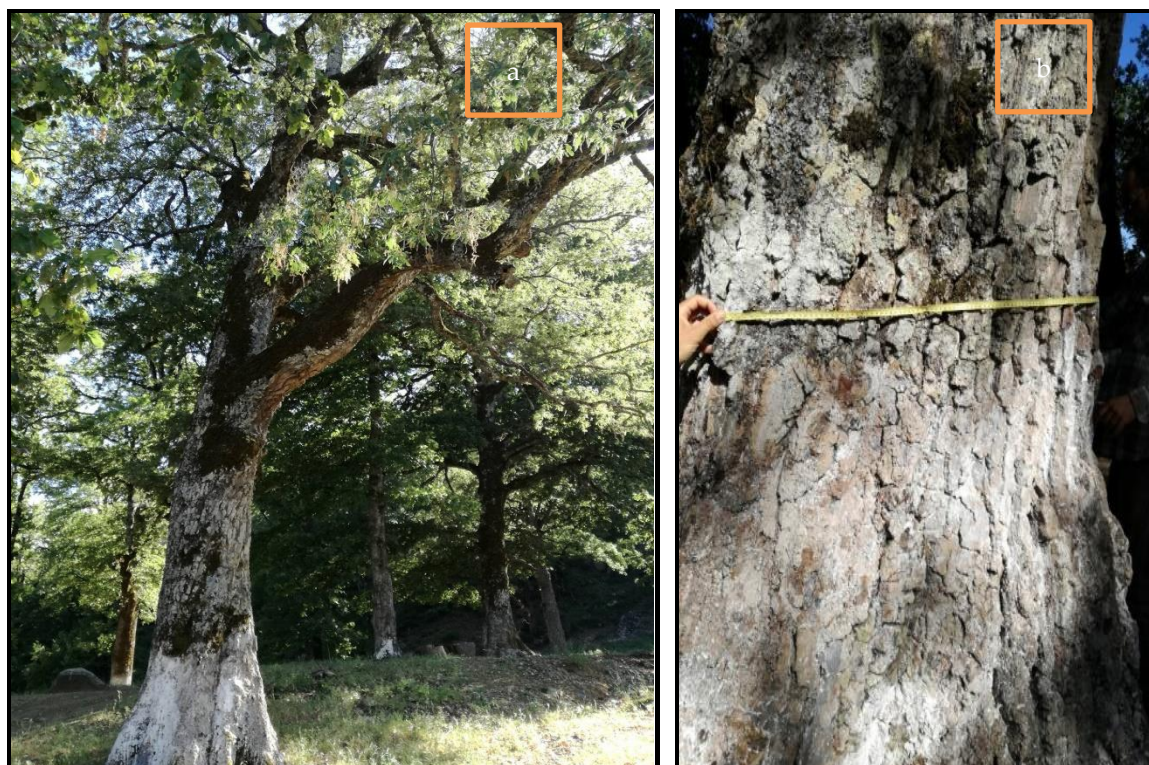

**Figure S3.** *Quercus afares*: a –tree, b-bark (Location: SH- Sidi El Hadi)

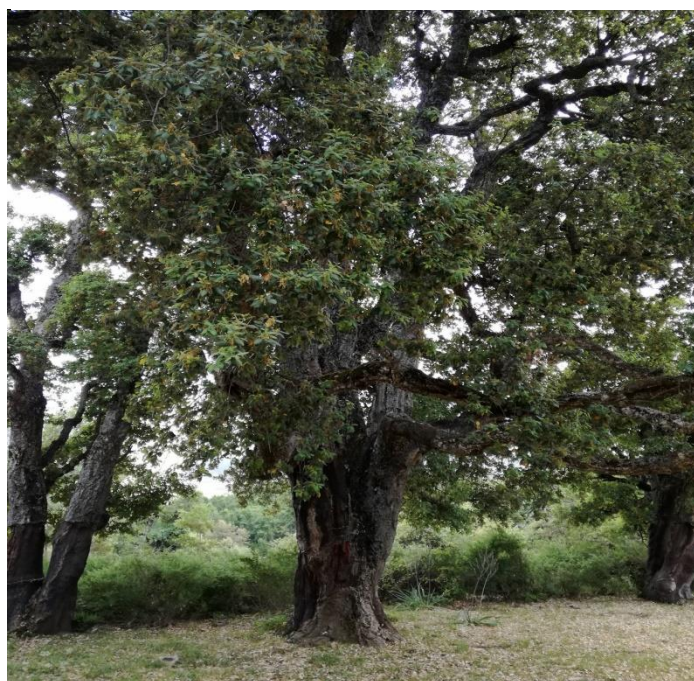

**Figure S4.** *Quercus suber* (Location: AD-Adrar)



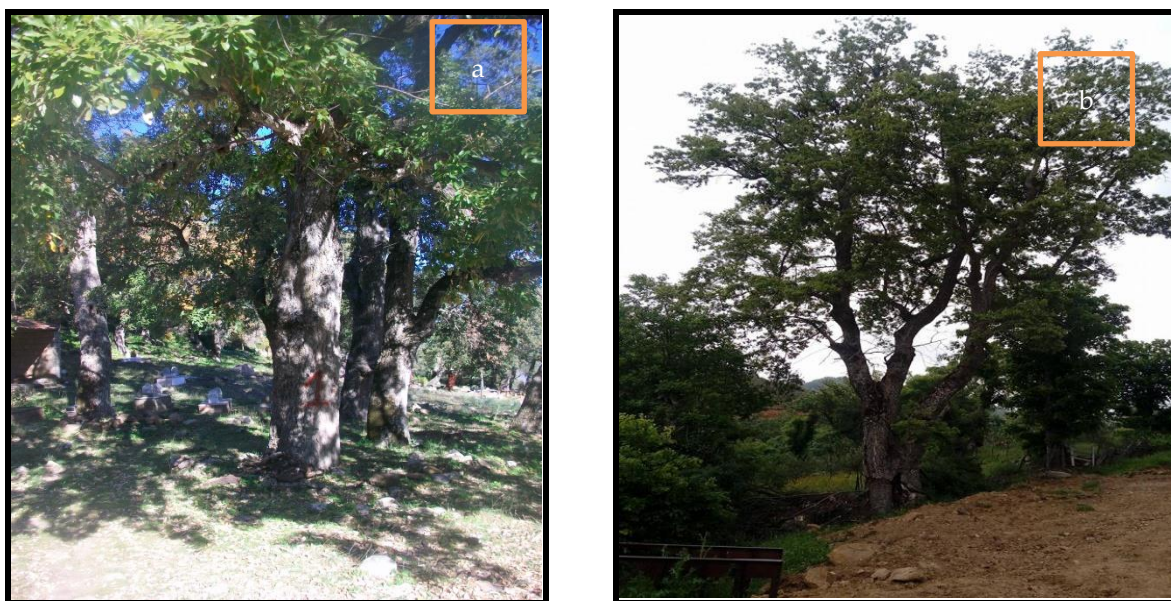

Figure S5. Hybrids (a-Location: YA-Yakouren, b- VM- Vide Mehaga)

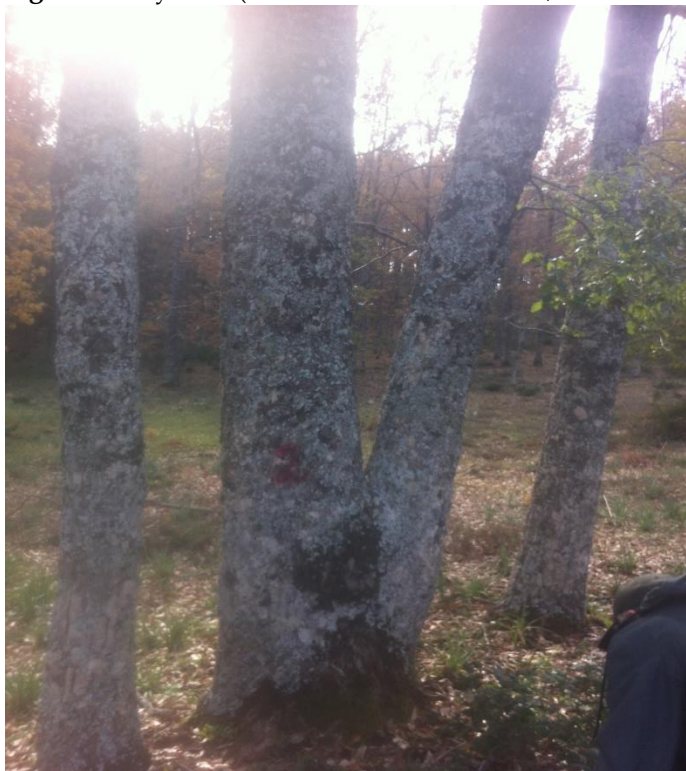

Figure S6. Hybrids (Location: LN- Lac noir)

*Q. canariensis* Willd.

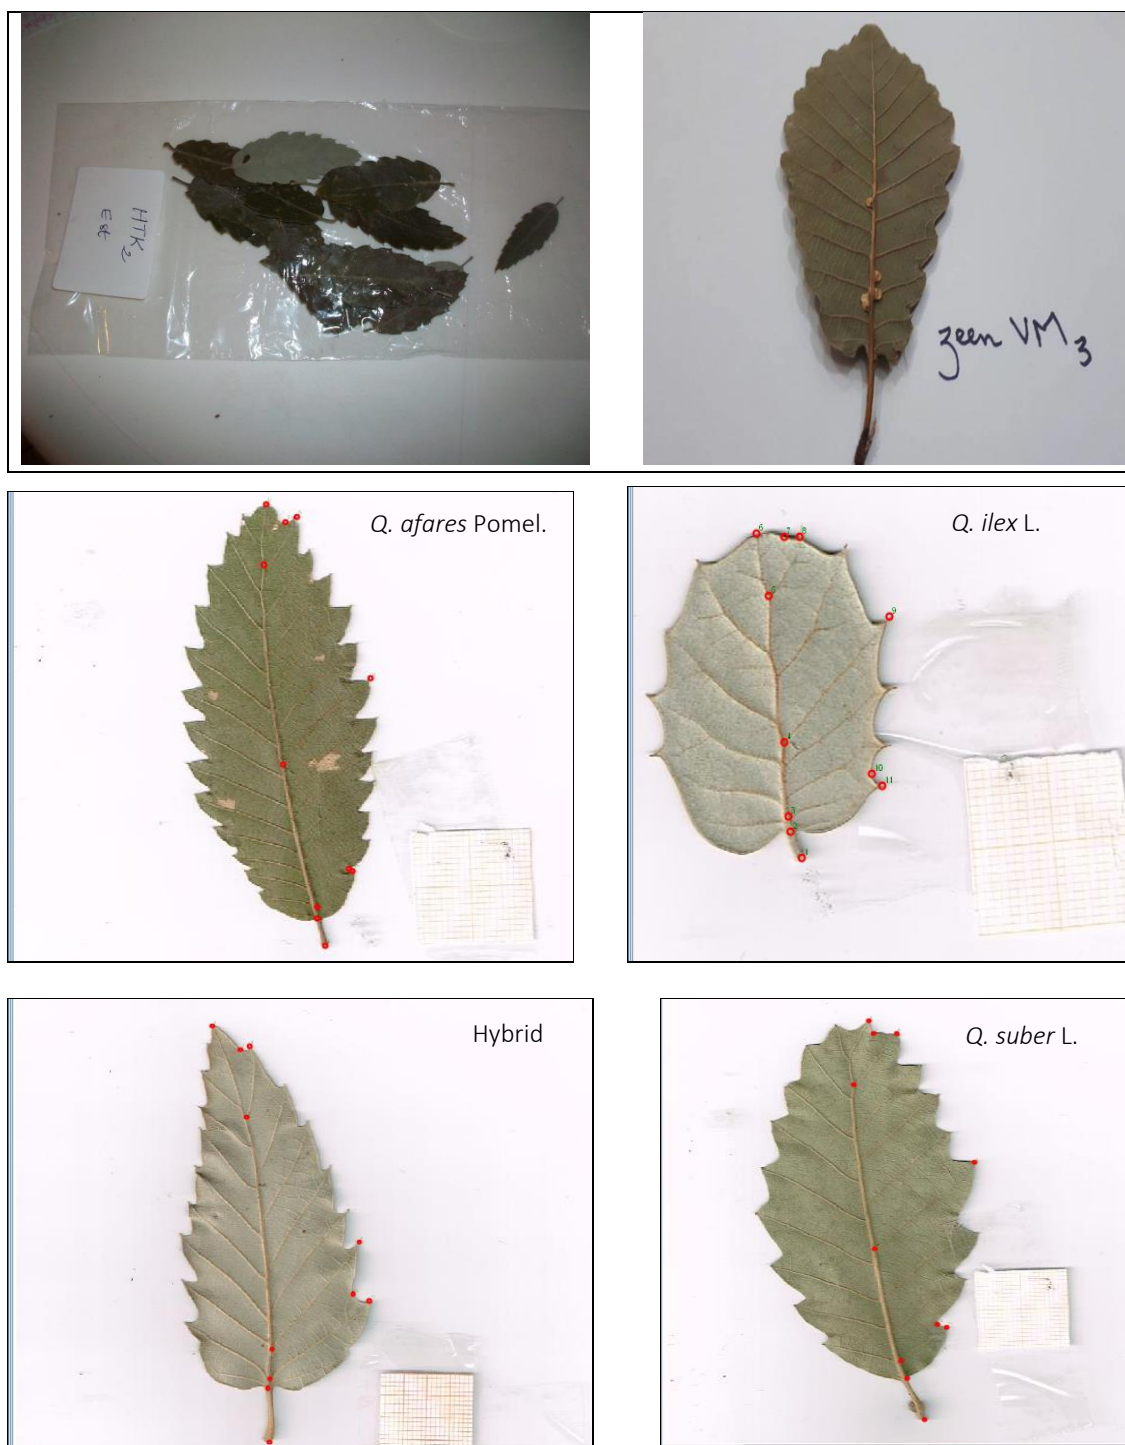

Figure S7. Leaves from the different species analysed.

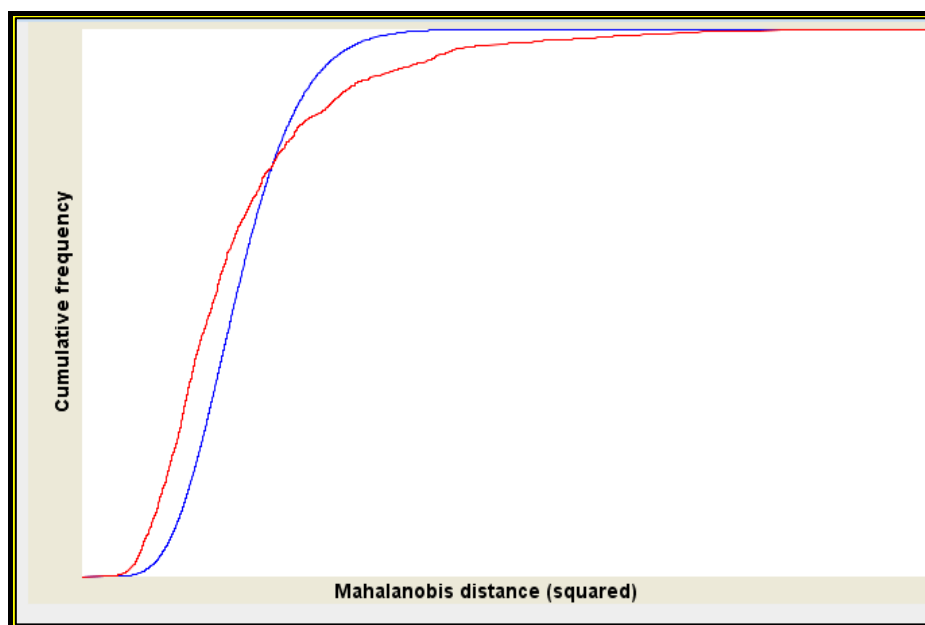

**Figure S8:** Cumulative distribution of distances of individual samples of the average distribution of the complete sample. In blue: the expected curve for a normal multivariate distribution adjusted to the data, In red : the distances distribution for all the data.

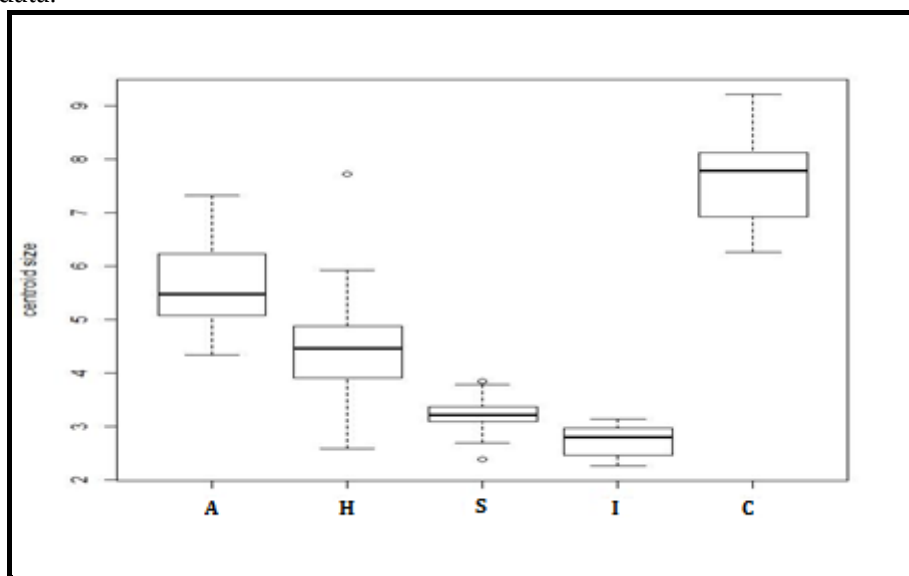

**Figure S9.** Size Centroid variation after average species within trees (box plot). [*Q. afares* (A), *Q. suber* (S), *Q. ilex* (I), *Q. canariensis* (C) and the hybrids (H)]

### Annex 1. Genetic characterization

DNA was extracted and purified from dried leaves using Invisorb DNA Plant HTS 96 Kit/C. A total of five nuclear microsatellites were used following Moran *et al.* (2016), where primers were dyed labelled (FAM, PET, VIC, NED) and DNA was amplified following Ortego *et al.* (2014). Amplification products were sent to an ABI Genetic Analyzer (ABI, St. Louis, MO) and genotypes were scored using Genemarker (Holland and Parson, 2011).

**Table S1. Allele frequency for the material analysed (5 individuals for each species).**

| Locus        | Allele     | QSU   | QAF   | QCA   | QIL   | QH1   | QH2   | QH3   | QH4   |
|--------------|------------|-------|-------|-------|-------|-------|-------|-------|-------|
| <b>MSQ13</b> | <b>190</b> | 0,000 | 0,000 | 0,125 | 0,000 | 0,000 | 0,000 | 0,000 | 0,000 |
|              | <b>194</b> | 0,000 | 0,000 | 0,125 | 0,000 | 0,000 | 0,000 | 0,000 | 0,000 |
|              | <b>199</b> | 0,000 | 0,000 | 0,000 | 0,400 | 0,000 | 0,000 | 0,000 | 0,000 |
|              | <b>203</b> | 0,000 | 0,000 | 0,000 | 0,200 | 0,000 | 0,000 | 0,000 | 0,000 |
|              | <b>205</b> | 0,000 | 0,000 | 0,000 | 0,100 | 0,000 | 0,000 | 0,500 | 0,000 |
|              | <b>207</b> | 0,000 | 0,000 | 0,000 | 0,100 | 0,000 | 0,000 | 0,000 | 0,000 |
|              | <b>209</b> | 0,000 | 0,000 | 0,000 | 0,100 | 0,000 | 0,000 | 0,000 | 0,000 |
|              | <b>214</b> | 0,000 | 0,000 | 0,000 | 0,100 | 0,000 | 0,000 | 0,000 | 0,000 |
|              | <b>219</b> | 0,900 | 0,000 | 0,250 | 0,000 | 0,500 | 0,500 | 0,500 | 0,000 |
|              | <b>223</b> | 0,100 | 1,000 | 0,375 | 0,000 | 0,167 | 0,500 | 0,000 | 1,000 |
|              | <b>225</b> | 0,000 | 0,000 | 0,125 | 0,000 | 0,333 | 0,000 | 0,000 | 0,000 |
| <b>ZAG46</b> | <b>180</b> | 0,200 | 0,167 | 0,000 | 0,000 | 0,167 | 0,000 | 1,000 | 0,400 |
|              | <b>181</b> | 0,000 | 0,000 | 0,000 | 0,500 | 0,000 | 0,000 | 0,000 | 0,300 |
|              | <b>188</b> | 0,300 | 0,000 | 0,000 | 0,000 | 0,333 | 0,000 | 0,000 | 0,000 |
|              | <b>190</b> | 0,500 | 0,167 | 0,000 | 0,000 | 0,000 | 0,000 | 0,000 | 0,000 |
|              | <b>191</b> | 0,000 | 0,000 | 0,000 | 0,250 | 0,000 | 0,500 | 0,000 | 0,100 |
|              | <b>192</b> | 0,000 | 0,000 | 0,000 | 0,000 | 0,167 | 0,000 | 0,000 | 0,000 |
|              | <b>193</b> | 0,000 | 0,167 | 0,000 | 0,000 | 0,167 | 0,000 | 0,000 | 0,000 |
|              | <b>194</b> | 0,000 | 0,167 | 0,000 | 0,000 | 0,167 | 0,000 | 0,000 | 0,000 |
|              | <b>195</b> | 0,000 | 0,333 | 0,000 | 0,000 | 0,000 | 0,500 | 0,000 | 0,200 |
|              | <b>200</b> | 0,000 | 0,000 | 0,500 | 0,000 | 0,000 | 0,000 | 0,000 | 0,000 |
|              | <b>207</b> | 0,000 | 0,000 | 0,500 | 0,000 | 0,000 | 0,000 | 0,000 | 0,000 |
|              | <b>215</b> | 0,000 | 0,000 | 0,000 | 0,250 | 0,000 | 0,000 | 0,000 | 0,000 |
| <b>ZAG15</b> | <b>103</b> | 0,100 | 0,000 | 0,000 | 0,000 | 0,167 | 0,000 | 0,000 | 0,000 |
|              | <b>104</b> | 0,100 | 0,167 | 0,000 | 0,000 | 0,000 | 0,000 | 0,500 | 0,100 |
|              | <b>108</b> | 0,000 | 0,000 | 0,750 | 0,000 | 0,000 | 0,000 | 0,000 | 0,000 |
|              | <b>109</b> | 0,000 | 0,000 | 0,125 | 0,000 | 0,000 | 0,000 | 0,000 | 0,000 |
|              | <b>110</b> | 0,000 | 0,000 | 0,125 | 0,000 | 0,000 | 0,000 | 0,000 | 0,000 |
|              | <b>113</b> | 0,000 | 0,000 | 0,000 | 0,100 | 0,000 | 0,000 | 0,000 | 0,000 |
|              | <b>114</b> | 0,000 | 0,000 | 0,000 | 0,300 | 0,000 | 0,000 | 0,000 | 0,000 |
|              | <b>120</b> | 0,200 | 0,000 | 0,000 | 0,000 | 0,167 | 0,000 | 0,500 | 0,000 |
|              | <b>121</b> | 0,100 | 0,000 | 0,000 | 0,000 | 0,167 | 0,000 | 0,000 | 0,000 |
|              | <b>123</b> | 0,500 | 0,333 | 0,000 | 0,100 | 0,500 | 0,000 | 0,000 | 0,700 |
|              | <b>124</b> | 0,000 | 0,167 | 0,000 | 0,200 | 0,000 | 0,000 | 0,000 | 0,200 |
|              | <b>125</b> | 0,000 | 0,333 | 0,000 | 0,100 | 0,000 | 0,000 | 0,000 | 0,000 |
|              | <b>137</b> | 0,000 | 0,000 | 0,000 | 0,100 | 0,000 | 0,000 | 0,000 | 0,000 |
|              | <b>146</b> | 0,000 | 0,000 | 0,000 | 0,100 | 0,000 | 0,000 | 0,000 | 0,000 |

| Locus         | Allele     | QSU   | QAF   | QCA   | QIL   | QH1   | QH2   | QH3   | QH4   |
|---------------|------------|-------|-------|-------|-------|-------|-------|-------|-------|
| <b>ZAG112</b> | <b>84</b>  | 0,000 | 0,000 | 0,000 | 0,750 | 0,000 | 0,000 | 0,000 | 0,000 |
|               | <b>85</b>  | 0,000 | 0,000 | 0,000 | 0,000 | 0,000 | 0,000 | 0,000 | 0,125 |
|               | <b>87</b>  | 0,100 | 0,833 | 0,750 | 0,000 | 0,500 | 0,500 | 0,000 | 0,750 |
|               | <b>88</b>  | 0,200 | 0,000 | 0,125 | 0,000 | 0,000 | 0,000 | 0,000 | 0,000 |
|               | <b>89</b>  | 0,000 | 0,000 | 0,000 | 0,250 | 0,000 | 0,000 | 0,000 | 0,125 |
|               | <b>92</b>  | 0,000 | 0,000 | 0,125 | 0,000 | 0,000 | 0,000 | 0,000 | 0,000 |
|               | <b>97</b>  | 0,000 | 0,167 | 0,000 | 0,000 | 0,000 | 0,000 | 0,000 | 0,000 |
|               | <b>99</b>  | 0,200 | 0,000 | 0,000 | 0,000 | 0,000 | 0,000 | 0,000 | 0,000 |
|               | <b>101</b> | 0,100 | 0,000 | 0,000 | 0,000 | 0,250 | 0,000 | 0,000 | 0,000 |
|               | <b>103</b> | 0,400 | 0,000 | 0,000 | 0,000 | 0,250 | 0,500 | 1,000 | 0,000 |
| <b>ZAG9</b>   | <b>218</b> | 0,000 | 0,000 | 0,000 | 0,100 | 0,000 | 0,000 | 0,000 | 0,000 |
|               | <b>224</b> | 1,000 | 0,833 | 0,000 | 0,000 | 0,833 | 0,500 | 0,500 | 1,000 |
|               | <b>230</b> | 0,000 | 0,000 | 0,000 | 0,000 | 0,000 | 0,500 | 0,000 | 0,000 |
|               | <b>233</b> | 0,000 | 0,000 | 0,000 | 0,100 | 0,000 | 0,000 | 0,000 | 0,000 |
|               | <b>234</b> | 0,000 | 0,000 | 0,000 | 0,000 | 0,167 | 0,000 | 0,000 | 0,000 |
|               | <b>241</b> | 0,000 | 0,167 | 0,000 | 0,000 | 0,000 | 0,000 | 0,000 | 0,000 |
|               | <b>243</b> | 0,000 | 0,000 | 0,000 | 0,400 | 0,000 | 0,000 | 0,000 | 0,000 |
|               | <b>247</b> | 0,000 | 0,000 | 0,000 | 0,100 | 0,000 | 0,000 | 0,000 | 0,000 |
|               | <b>248</b> | 0,000 | 0,000 | 0,000 | 0,100 | 0,000 | 0,000 | 0,500 | 0,000 |
|               | <b>249</b> | 0,000 | 0,000 | 1,000 | 0,100 | 0,000 | 0,000 | 0,000 | 0,000 |
|               | <b>255</b> | 0,000 | 0,000 | 0,000 | 0,100 | 0,000 | 0,000 | 0,000 | 0,000 |

## References

- Morán-López T., Robledo-Arnuncio J. J., Díaz M., Morales J. M., Lázaro-Nogal A., Lorenzo Z., Valladares F. 2016. Determinants of functional connectivity of holm oak woodlands: Fragment size and mouse foraging behavior, *Forest Ecology and Management*, 368,111-122 doi.org/10.1016/j.foreco.2016.03.010
- Holland, M. M., Parson, W. 2011. GeneMarker HID: A Reliable Software Tool for the Analysis of Forensic STR Data. *Journal of Forensic Sciences*. 56(1): 29-35. doi.org/10.1111/j.1556-4029.2010.01565.x
- Ortego, J., Bonal, R., Muñoz, A., Aparicio, J.M. 2014. Extensive pollen immigration and no evidence of disrupted mating patterns or reproduction in a highly fragmented holm oak stand. *J. Plant Ecology* 7 (4), 384-395. doi.org/10.1093/jpe/rtt049
